# Supplementary material for: Do ART and Chemsex Drugs Get Along? Potential Drug–Drug Interactions in a Cohort of People Living with HIV Who Engaged in Chemsex: A Retrospective Observational Study
Source: PubMed Central journal article supplement — Infect Dis Ther. 2022 Sep 29;11(6):2111–24. doi: 10.1007/s40121-022-00694-w (PMC9669299; doi:10.1007/s40121-022-00694-w), 2022-09-29
Supplement: 40121_2022_694_MOESM1_ESM.pdf [file 40121_2022_694_MOESM1_ESM.pdf]

***Do ART and chemsex drugs get along? Potential drug-drug interactions in a cohort of people living with HIV who engaged in chemsex: a retrospective observational study***

Lorena DE LA MORA <sup>a</sup>, María J. NEBOT <sup>a</sup>, María MARTINEZ-REBOLLAR <sup>a</sup>, Elisa DE LAZZARI <sup>a</sup>, Montserrat TUSET <sup>b</sup>, Montserrat LAGUNO <sup>a</sup>, Juan AMBROSIONI <sup>a</sup>, Laia MIQUEL <sup>c</sup>, Jordi BLANCH <sup>c</sup>, Ainoa UGARTE <sup>a</sup>, Berta TORRES <sup>a</sup>, Ana GONZÁLEZ-CORDÓN <sup>a</sup>, Alexy INCIARTE <sup>a</sup>, Iván CHIVITE <sup>a</sup>, Duncan SHORT <sup>d</sup>, Emilio SALGADO <sup>f</sup>, Esteban MARTINEZ <sup>a</sup>, José L. BLANCO <sup>a</sup>, Josep MALLOLAS <sup>a</sup>

<sup>a</sup> HIV Unit, Infectious Diseases Service, Hospital Clinic, IDIBAPS AIDS and HIV research group, Barcelona University, Spain.

<sup>b</sup> Department of Pharmacy, Hospital Clinic, Barcelona. Spain.

<sup>c</sup> Addiction Unit (GRAC). Psychiatry and Psychology Department, Hospital Clinic of Barcelona, IDIBAPS, CIBERSAM, Barcelona University, Spain

<sup>d</sup> ViiV Healthcare, Brentford, Middlesex, UK

<sup>f</sup> Medical Toxicology Unit. Emergency Department. Hospital Clinic Barcelona. Spain.

**Correspondence to:** Maria MARTINEZ-REBOLLAR. HIV Unit, Infectious Diseases Service, Hospital Clinic, IDIBAPS AIDS and HIV research group, Barcelona University, Spain. Villarroel 170, 08036, Barcelona, Spain. Phone number: +34 983 227 55 74. Fax number: +34 93 4515424. Email: rebollar@clinic.cat

Appendix 1.

| Drug       | Flag   | ART   | N  | N  | %     |
|------------|--------|-------|----|----|-------|
| GHB        | GREEN  | EFV   | 6  | 49 | 12.2  |
|            | GREEN  | NEV   | 9  | 49 | 18.4  |
|            | GREEN  | RPV   | 34 | 49 | 69.4  |
|            | ORANGE | ATV/c | 1  | 59 | 1.7   |
|            | ORANGE | EVG/c | 28 | 59 | 47.5  |
|            | ORANGE | DRV/c | 30 | 59 | 50.8  |
| Extasis    | GREEN  | NEV   | 1  | 20 | 5.0   |
|            | GREEN  | EFV   | 2  | 20 | 10.0  |
|            | GREEN  | RPV   | 17 | 20 | 85.0  |
|            | ORANGE | DRV/c | 17 | 36 | 47.2  |
|            | ORANGE | EVG/c | 19 | 36 | 52.8  |
| Speed      | GREEN  | NEV   | 3  | 14 | 21.4  |
|            | GREEN  | RPV   | 11 | 14 | 78.6  |
|            | ORANGE | DRV/c | 15 | 32 | 46.9  |
|            | ORANGE | EVG/c | 17 | 32 | 53.1  |
| cannabis   | GREEN  | RPV   | 3  | 8  | 37.5  |
|            | GREEN  | NEV   | 5  | 8  | 62.5  |
|            | YELLOW | DRV/c | 8  | 20 | 40.0  |
|            | YELLOW | EVG/c | 12 | 20 | 60.0  |
|            | ORANGE | EFV   | 3  | 3  | 100.0 |
| Mephedrone | GREEN  | EFV   | 3  | 31 | 9.7   |
|            | GREEN  | NEV   | 6  | 31 | 19.4  |
|            | GREEN  | RPV   | 22 | 31 | 71.0  |
|            | ORANGE | ATV/c | 1  | 37 | 2.7   |
|            | ORANGE | DRV/c | 16 | 37 | 43.2  |
|            | ORANGE | EVG/c | 20 | 37 | 54.1  |
| ED agents  | GREEN  | RPV   | 38 | 38 | 100.0 |
|            | ORANGE | ATV/c | 1  | 75 | 1.3   |
|            | ORANGE | EFV   | 6  | 75 | 8.0   |
|            | ORANGE | NEV   | 7  | 75 | 9.3   |
|            | ORANGE | DRV/c | 28 | 75 | 37.3  |
|            | ORANGE | EVG/c | 33 | 75 | 44.0  |
| MDMA       | GREEN  | EFV   | 1  | 11 | 9.1   |
|            | GREEN  | NEV   | 1  | 11 | 9.1   |
|            | GREEN  | RPV   | 9  | 11 | 81.8  |
|            | ORANGE | EVG/c | 15 | 35 | 42.9  |
|            | ORANGE | DRV/c | 20 | 35 | 57.1  |

|                 |        |       |    |    |       |
|-----------------|--------|-------|----|----|-------|
| Ketamine        | GREEN  | RPV   | 23 | 23 | 100.0 |
|                 | ORANGE | EFV   | 2  | 46 | 4.3   |
|                 | ORANGE | NEV   | 3  | 46 | 6.5   |
|                 | ORANGE | DRV/c | 20 | 46 | 43.5  |
|                 | ORANGE | EVG/c | 21 | 46 | 45.7  |
| Methamphetamine | GREEN  | EFV   | 6  | 53 | 11.3  |
|                 | GREEN  | NEV   | 8  | 53 | 15.1  |
|                 | GREEN  | RPV   | 39 | 53 | 73.6  |
|                 | ORANGE | ATV/c | 1  | 59 | 1.7   |
|                 | ORANGE | DRV/c | 28 | 59 | 47.5  |
|                 | ORANGE | EVG/c | 30 | 59 | 50.8  |
| Cocaine         | ORANGE | EFV   | 4  | 77 | 5.2   |
|                 | ORANGE | NEV   | 5  | 77 | 6.5   |
|                 | ORANGE | EVG/c | 20 | 77 | 26.0  |
|                 | ORANGE | DRV/c | 22 | 77 | 28.6  |
|                 | ORANGE | RPV   | 26 | 77 | 33.8  |
| Poppers         | GREEN  | EFV   | 4  | 97 | 4.1   |
|                 | GREEN  | NEV   | 9  | 97 | 9.3   |
|                 | GREEN  | RPV   | 27 | 97 | 27.8  |
|                 | GREEN  | DRV/c | 27 | 97 | 27.8  |
|                 | GREEN  | EVG/c | 30 | 97 | 30.9  |
